# Supplementary material for: Sexual Harassment in Clinical Practice—A Cross-Sectional Study Among Nurses and Nursing Students in Sub-Saharan Africa
Source: PubMed Central journal article supplement — SAGE Open Nurs. 2020 Oct 29;6:2377960820963764. doi: 10.1177/2377960820963764 (PMC8832299; doi:10.1177/2377960820963764), 2020-10-29
Supplement: sj-pdf-1-son-10.1177_2377960820963764.pdf [file sj-pdf-1-son-10.1177_2377960820963764.pdf]

## Appendices

### Data collection tool

An anonymous self-administered questionnaire about sexual harassment at XXXX.  
Answer the questions with X, you can choose more than one option.

#### Definition of sexual harassment:

Any unwanted physical contact and conduct, gesture, verbal and non-verbal communication of sexual nature independent of the number of incidents and gender of the victim or perpetrator.

#### ***PART A: DEMOGRAPHIC INFORMATION***

1. What is your gender?

Female: \_\_\_\_ Male: \_\_\_\_ Other: \_\_\_\_

Select your age bracket:

18-29: \_\_\_\_ 30-41: \_\_\_\_ 42-53: \_\_\_\_ 54-65: \_\_\_\_ 65+: \_\_\_\_

2. What is your occupation?

Nurse: \_\_\_\_ Nursing student: \_\_\_\_

3. **If you are a nurse**, what kind of nurse are you?

Assistant nurse officer: \_\_\_\_ Nurse Officer: \_\_\_\_ Enrolled Nurse: \_\_\_\_

How many years have you been working as a **nurse**:

Less than 1 y: \_\_\_\_ 1-5 y: \_\_\_\_ 5-10 y: \_\_\_\_ 10-20 y: \_\_\_\_ more than 20 y: \_\_\_\_

4. **If you are a nursing student**, which nursing program are you attending?

In-service BS: \_\_\_\_ Pre-service: \_\_\_\_ Diploma: \_\_\_\_

Which year are you in?

First: \_\_\_\_ Second: \_\_\_\_ Third: \_\_\_\_ Fourth: \_\_\_\_

***PART B: SEXUAL HARASSMENT***

5. Do you know if there is a law against sexual harassment in Tanzania?

Yes: \_\_\_\_ No: \_\_\_\_

6. Have you ever been a victim of sexual harassment as a nurse or a nursing student? (*If yes, please answer questions 7-15*)

Yes: \_\_\_\_ No: \_\_\_\_ Don't want to say: \_\_\_\_

**If No**, have you ever heard of a fellow student and/or a colleague, that has been sexually harassed?

Yes: \_\_\_\_ No: \_\_\_\_ (*if yes, please answer questions 8,9,10 &11*)

7. How many times have you been sexually harassed?

1: \_\_\_\_ 2: \_\_\_\_ 3: \_\_\_\_ 4: \_\_\_\_ more than 5 times: \_\_\_\_

8. What kind/s of sexual harassment/s was it? (*It is possible to mark more than one option.*)

Have you ever had an intimate relationship to obtain your position at work or to pass your clinical practice? \_\_\_\_

Unwelcome touching (for example pinching or grabbing): \_\_\_\_

Unwelcome hugging or kissing: \_\_\_\_

Inappropriate physical contact that made you feel uncomfortable: \_\_\_\_

Inappropriate invitations to go out: \_\_\_\_

Request or pressure for sex/other sexual acts: \_\_\_\_

Any other unwelcome conduct of sexual nature: \_\_\_\_

Sexual jokes or comments: \_\_\_\_

Inappropriate staring: \_\_\_\_

Has anyone showed, given or sent you sexual pictures or messages: \_\_\_\_

Attempts to have sex: \_\_\_\_

If you want to, please describe the event:

---

---

---

---

---

---

---

---

9. When did it happen?

During workhours: \_\_\_\_ Before / after your shift: \_\_\_\_?

10. Who was the perpetrator/s? (*the person/s responsible for the sexual harassment/s. It is possible to mark more than one option.*)

Supervisor/boss: \_\_\_\_

Doctor: \_\_\_\_

Nurse: \_\_\_\_

Student: \_\_\_\_

Patient: \_\_\_\_

A patient's family member: \_\_\_\_

Other health care staff: \_\_\_\_

Stranger: \_\_\_\_

11. What was the gender of the perpetrator/s?

Female: \_\_\_\_ Male: \_\_\_\_

12. Did you tell anyone about it?

Yes: \_\_\_\_ No: \_\_\_\_

**If no**, please describe why you did not tell anyone:

---

---

**If yes, who/whom did you tell? (It is possible to mark more than one option.)**

Family member: \_\_\_\_\_

Friend: \_\_\_\_\_

Colleague: \_\_\_\_\_

Husband/ wife/ girlfriend/ boyfriend: \_\_\_\_\_

If other/s, please describe your relationship to that person/s: \_\_\_\_\_

13. Did you report it to your supervisor/boss at KCMC?

Yes: \_\_\_\_\_ No: \_\_\_\_\_

**If you are a student, did you report it to your school?**

Yes: \_\_\_\_\_ No: \_\_\_\_\_

14. How did you feel at that time?

Upset: \_\_\_\_\_

Angry: \_\_\_\_\_

Ashamed: \_\_\_\_\_

Afraid: \_\_\_\_\_

Other, please describe:

---

---

15. How did you feel after the event?

Upset: \_\_\_\_\_

Angry: \_\_\_\_\_

Ashamed: \_\_\_\_\_

Afraid: \_\_\_\_\_

Depressed: \_\_\_\_\_

Sad: \_\_\_\_\_

The event affected your work performance: \_\_\_\_\_

Uncomfortable going back to work/ clinic practice: \_\_\_\_\_

Irritated: \_\_\_\_\_

Trouble sleeping: \_\_\_\_

Others, please describe:

---

---

If you want to add something more please do it here:

---

---

---

---

---

**Thank you for your participation!**
